# Supplementary material
Source: bioRxiv or medRxiv preprint supplement (https://medrxiv.org/highwire/filestream/76917/field_highwire_adjunct_files/3/2020.04.14.20065862-4.pdf)
Supplement: Supplementary file [file 2020.04.14.20065862-4.pdf]

## 1. Knowledge of nCoV transmission and prevention (7 questions)

|     |                                                                                                                                                                                                                                                                                                                                                                                                                                                                                                            |                                                                |
|-----|------------------------------------------------------------------------------------------------------------------------------------------------------------------------------------------------------------------------------------------------------------------------------------------------------------------------------------------------------------------------------------------------------------------------------------------------------------------------------------------------------------|----------------------------------------------------------------|
| 1.1 | Are you aware of the novel coronavirus situation?                                                                                                                                                                                                                                                                                                                                                                                                                                                          | 1 = Yes; 0 = No (if no, don't have to proceed with the survey) |
| 1.2 | What are the symptoms of the novel coronavirus:<br><ol style="list-style-type: none"> <li>1. Fever</li> <li>2. Cough</li> <li>3. Breathing difficulty or shortness of breath</li> <li>4. Nausea/Vomiting</li> <li>5. Diarrhoea</li> <li>6. Muscle ache</li> <li>7. Chills/Shivering spells</li> <li>8. Skin rash</li> <li>9. Sore throat</li> <li>10. Runny nose</li> </ol>                                                                                                                                | Check all that apply                                           |
| 1.3 | Do you think the novel coronavirus can be spread by:<br><ol style="list-style-type: none"> <li>1. Coughing</li> <li>2. Sneezing</li> <li>3. Close personal contact (e.g. handshake, hugs)</li> <li>4. Touching contaminated surfaces (eg: door handles)</li> <li>5. Contact with human faeces</li> <li>6. Contact with animals/animal faeces</li> <li>7. Touching/eating raw meat</li> <li>8. Touching/eating contaminated food</li> <li>9. Mosquito bites</li> </ol>                                      | Check all that apply                                           |
| 1.4 | How long do you think it takes for a person to become sick if he/she is infected with the novel coronavirus?                                                                                                                                                                                                                                                                                                                                                                                               | ____ days                                                      |
| 1.5 | Where do you think people are most likely to contract the novel coronavirus?<br><ol style="list-style-type: none"> <li>1. Home</li> <li>2. GP</li> <li>3. Polyclinic</li> <li>4. Hospitals</li> <li>5. Public transport</li> <li>6. Markets</li> <li>7. Shopping malls</li> <li>8. Countries with coronavirus outbreaks</li> <li>9. Airplanes</li> <li>10. Workplaces</li> <li>11. Schools/childcare centres</li> <li>12. Playgrounds</li> <li>13. Hawker centres/coffee shops</li> <li>14. Gym</li> </ol> | Check all that apply                                           |
| 1.6 | What are some ways you can protect yourself against the novel coronavirus?<br><ol style="list-style-type: none"> <li>1. Good personal hygiene</li> </ol>                                                                                                                                                                                                                                                                                                                                                   | Check all that apply                                           |

|     |                                                                                                                                                                                                                                                                                                                                                                                                                                                    |                      |
|-----|----------------------------------------------------------------------------------------------------------------------------------------------------------------------------------------------------------------------------------------------------------------------------------------------------------------------------------------------------------------------------------------------------------------------------------------------------|----------------------|
|     | <ol style="list-style-type: none"> <li>2. Wash hands frequently with soap</li> <li>3. Use hand sanitiser/alcohol rub</li> <li>4. Drink warm water</li> <li>5. Wear a surgical mask</li> <li>6. Wear an N95 mask</li> <li>7. Take vitamin C</li> <li>8. Avoid mosquito bites</li> <li>9. Avoid contact with live animals including poultry and birds</li> <li>10. Avoid eating raw or undercooked meat</li> <li>11. Avoid crowded places</li> </ol> |                      |
| 1.7 | <p>What control measures has the government put in place so far?</p> <ol style="list-style-type: none"> <li>1. Restricting travel into Singapore from China</li> <li>2. Restricting travel to China</li> <li>3. Screening of patients at hospital emergency departments</li> <li>4. Temperature and health screening at land, air and sea entry points to Singapore</li> <li>5. Suspected cases warded in hospital isolation rooms</li> </ol>      | Check all that apply |

## 2. Sources of information (7 questions)

|     |                                                                                                                                                                                                                                                                                                                                                                                                                                                                                                                                                                                                                                                                              |                                    |
|-----|------------------------------------------------------------------------------------------------------------------------------------------------------------------------------------------------------------------------------------------------------------------------------------------------------------------------------------------------------------------------------------------------------------------------------------------------------------------------------------------------------------------------------------------------------------------------------------------------------------------------------------------------------------------------------|------------------------------------|
| 2.1 | Have you actively searched for information on the novel coronavirus?                                                                                                                                                                                                                                                                                                                                                                                                                                                                                                                                                                                                         | 1= Yes, 0=No<br>(if no, go to 2.4) |
| 2.2 | <p>What are the main sources of information you used for information about the novel coronavirus?</p> <ol style="list-style-type: none"> <li>1. Newspaper</li> <li>2. Television (e.g. CNA, Channel 5/8/U, Vasantham, Suria)</li> <li>3. Radio</li> <li>4. Internet search (e.g. Google, Yahoo, MSN, Bing)</li> <li>5. Social media (e.g. Facebook, Twitter, Instagram)</li> <li>6. Social networking sites (e.g. Whatsapp/Telegram/WeChat/LINE/KakaoTalk)</li> <li>7. Friends and family members</li> <li>8. Workplace</li> <li>9. Doctors</li> <li>10. Other health professionals</li> <li>11. Official government websites (e.g. MOH, HPB, MOM, SGSecure etc.)</li> </ol> | Check all that apply               |
| 2.3 | <p>For the following sources of information about the novel coronavirus, please rank them according to how trustworthy they are:</p> <ol style="list-style-type: none"> <li>1. Newspaper</li> <li>2. Television (e.g. CNA, Channel 5/8/U, Vasantham, Suria)</li> <li>3. Radio</li> <li>4. Internet search (e.g. Google, Yahoo, MSN, Bing)</li> <li>5. Social media (e.g. Facebook, Twitter, Instagram)</li> </ol>                                                                                                                                                                                                                                                            | Rank                               |

|     |                                                                                                                                                                                                                                                                                                                                                                                                                                                                                                                                                                          |                                                        |
|-----|--------------------------------------------------------------------------------------------------------------------------------------------------------------------------------------------------------------------------------------------------------------------------------------------------------------------------------------------------------------------------------------------------------------------------------------------------------------------------------------------------------------------------------------------------------------------------|--------------------------------------------------------|
|     | <ol style="list-style-type: none"> <li>6. Social networking sites (e.g. Whatsapp/Telegram/WeChat/LINE/KakaoTalk)</li> <li>7. Friends and family members</li> <li>8. Workplace</li> <li>9. Doctors</li> <li>10. Other health professionals</li> <li>11. Official government websites (e.g. MOH, HPB, MOM, SGSecure etc.)</li> </ol>                                                                                                                                                                                                                                       |                                                        |
| 2.4 | <p>Have you received any unsolicited information about the novel coronavirus from these sources that you did not deliberately search for? (these include news stories, health advice, advertisements, personal stories)</p> <ol style="list-style-type: none"> <li>1. Facebook</li> <li>2. Whatsapp</li> <li>3. Twitter</li> <li>4. WeChat</li> <li>5. Weibo</li> <li>6. Telegram</li> <li>7. Instagram</li> <li>8. Kakao Talk</li> <li>9. LINE</li> </ol>                                                                                                               | <p>1 = Yes;<br/>0 = No<br/>(If no, go to 3.1)</p>      |
| 2.5 | <p>Did you receive any of the following types of information about the novel coronavirus?</p> <ol style="list-style-type: none"> <li>1. News stories</li> <li>2. Health advice</li> <li>3. Personal stories</li> <li>4. Advertisements for health remedies/products/treatments</li> </ol>                                                                                                                                                                                                                                                                                | <p>Check all that apply</p> <p>1 = Yes;<br/>0 = No</p> |
| 2.6 | <p>Did you share these with others?</p>                                                                                                                                                                                                                                                                                                                                                                                                                                                                                                                                  | <p>1 = Yes;<br/>0 = No<br/>(If no, go to 3.1)</p>      |
| 2.7 | <p>Why did you share these with others?</p> <ol style="list-style-type: none"> <li>1. I thought the information was important</li> <li>2. I thought the information came from a reliable source</li> <li>3. I thought the information came from an influential source</li> <li>4. I thought the information was accurate</li> <li>5. I thought the information was fun/entertaining</li> <li>6. I thought the information was not trustworthy</li> <li>7. I thought the information was urgent</li> <li>8. I thought others would find the information useful</li> </ol> | <p>Check all that apply</p>                            |

### 3. Self-efficacy and information needs (14 questions)

|      |                                                                                                                                                                                                                                                          |                                                                                           |
|------|----------------------------------------------------------------------------------------------------------------------------------------------------------------------------------------------------------------------------------------------------------|-------------------------------------------------------------------------------------------|
|      | Do you feel that you have enough information about:                                                                                                                                                                                                      | 1= Yes; 0 = No                                                                            |
| 3.1  | How to protect yourself from the novel coronavirus                                                                                                                                                                                                       |                                                                                           |
| 3.2  | How to protect family members from the novel coronavirus                                                                                                                                                                                                 |                                                                                           |
| 3.3  | What to do if you think you are infected                                                                                                                                                                                                                 |                                                                                           |
| 3.4  | How to protect others around you if you are infected                                                                                                                                                                                                     |                                                                                           |
| 3.5  | What control measures the health authorities are taking to control the spread of the virus                                                                                                                                                               |                                                                                           |
| 3.6  | Why the health authorities are taking these specific control measures                                                                                                                                                                                    |                                                                                           |
| 3.7  | How the novel coronavirus can be transmitted                                                                                                                                                                                                             |                                                                                           |
| 3.8  | What symptoms you might have if you are infected                                                                                                                                                                                                         |                                                                                           |
| 3.9  | The risk of infection to you and your family                                                                                                                                                                                                             |                                                                                           |
| 3.10 | Is there additional information about the new coronavirus you feel you need? If so, please specify                                                                                                                                                       | Free text                                                                                 |
| 3.11 | How would you like to receive this information?<br>1. Newspapers<br>2. Television<br>3. Radio<br>4. Internet<br>5. Social networking websites<br>6. Others (please specify: _____)                                                                       | Check all that apply                                                                      |
| 3.12 | From whom would you like to receive this information?<br>1. General Practitioner<br>2. Local health institute (eg. Polyclinics)<br>3. National health bodies (eg. MOH, HPB)<br>4. Employer<br>5. Family and friends<br>6. Others (please specify: _____) | Check all that apply                                                                      |
| 3.13 | How confident are you that you can protect yourself against the novel coronavirus?                                                                                                                                                                       | 1=not confident at all,<br>2=somewhat confident,<br>3=quite confident<br>4=very confident |
| 3.14 | If you became infected with the novel coronavirus, how confident are you that you could avoid spreading the                                                                                                                                              | 1=not confident at all,<br>2=somewhat confident,                                          |

|  |                  |                                       |
|--|------------------|---------------------------------------|
|  | virus to others? | 3=quite confident<br>4=very confident |
|--|------------------|---------------------------------------|

#### 4. Anxiety (22 questions)

|     |                                                                                                                                                                                                    |                                                                                                                                                                                                         |
|-----|----------------------------------------------------------------------------------------------------------------------------------------------------------------------------------------------------|---------------------------------------------------------------------------------------------------------------------------------------------------------------------------------------------------------|
| 4.1 | If you were to develop symptoms of coronavirus tomorrow, how worried would you be?                                                                                                                 | 1=not at all worried,<br>2=much less worried than normal,<br>3=worried less than normal,<br>4=about the same,<br>5=worried more than normal,<br>6=worried much more than normal,<br>7=extremely worried |
| 4.2 | In the past one week, have you worried about catching coronavirus?                                                                                                                                 | 1=no, never think about it,<br>2=think about it but it didn't worry me,<br>3=worried me a bit,<br>4=worried me a lot,<br>5=worried about it all the time                                                |
| 4.3 | Please rate the current level of your worry towards coronavirus:                                                                                                                                   | Score ranges from <u>1</u> -<br><u>10</u> (1 =very mild, 10 =very severe)                                                                                                                               |
| 4.4 | How likely do you think it is that you will contract coronavirus over the next 1 month?                                                                                                            | 1=Never, 2=very unlikely, 3=unlikely,<br>4=even, 5=likely, 6=very likely, 7=certain                                                                                                                     |
| 4.5 | Given what you know about coronavirus, does it make you more or less willing to travel to the following countries <u>as of this moment</u> ?<br>- China<br>- Australia<br>- Thailand<br>- Malaysia | 1=much more willing,<br>2=more willing,<br>3=neither more or less willing, 4=less willing,<br>5=much less willing                                                                                       |
| 4.6 | Given what you know about coronavirus, does it make you more or less willing to travel outside of Singapore <u>as of this moment</u> ?                                                             | 1=much more willing,<br>2=more willing,<br>3=neither more or less willing, 4=less willing,<br>5=much less willing                                                                                       |

|      |                                                                                                                                        |                                                                                                          |
|------|----------------------------------------------------------------------------------------------------------------------------------------|----------------------------------------------------------------------------------------------------------|
| 4.7  | Given what you know about coronavirus, does it make you more or less willing to travel outside of Singapore <u>in the next month</u> ? | 1=much more willing, 2=more willing, 3=neither more or less willing, 4=less willing, 5=much less willing |
|      | Please indicate the degree to which you agree with the following statements                                                            | 1= completely disagree; 2 = disagree; 3 = don't disagree or agree; 4 = agree; 5 = completely agree       |
| 4.8  | There is nothing we can do about the novel coronavirus                                                                                 |                                                                                                          |
| 4.9  | The threat is exaggerated by the media                                                                                                 |                                                                                                          |
| 4.10 | The threat is exaggerated by the government                                                                                            |                                                                                                          |
| 4.11 | The threat is exaggerated by the health authorities                                                                                    |                                                                                                          |
| 4.12 | The measures being taken by the health authorities are not enough to control the spread of coronavirus                                 |                                                                                                          |
| 4.13 | I will stock up and stay indoors for as long as necessary                                                                              |                                                                                                          |
| 4.14 | Singapore is well-prepared to deal with the novel coronavirus                                                                          |                                                                                                          |
| 4.15 | Family and friends around me are anxious about the novel coronavirus                                                                   |                                                                                                          |
| 4.16 | I worry that my family and friends could get infected with the novel coronavirus                                                       |                                                                                                          |
| 4.17 | I would say I'm a superstitious person                                                                                                 |                                                                                                          |
| 4.18 | If someone is meant to get a serious disease, they will get it no matter what they do                                                  |                                                                                                          |
| 4.19 | My health is determined by fate                                                                                                        |                                                                                                          |
| 4.20 | My health is determined by luck                                                                                                        |                                                                                                          |
| 4.21 | If someone is meant to get a disease it doesn't matter what kind of food they eat, they will get the disease anyway                    |                                                                                                          |
| 4.22 | If someone is meant to have a serious disease they will get that disease                                                               |                                                                                                          |

## 5. Confidence in authority (12 questions)

|      |                                                                                                                                                             |                                                                                                |
|------|-------------------------------------------------------------------------------------------------------------------------------------------------------------|------------------------------------------------------------------------------------------------|
|      | Please indicate the degree to which you agree with the following statements                                                                                 | 0 = Strongly disagree; 1 = Disagree; 2 = Neither agree/disagree; 3 = Agree; 4 = Strongly agree |
| 5.1  | The government has been open with information regarding the new coronavirus                                                                                 |                                                                                                |
| 5.2  | The government has been honest with information regarding the new coronavirus                                                                               |                                                                                                |
| 5.3  | I trust the information that the government has provided about the new coronavirus                                                                          |                                                                                                |
| 5.4  | I am confident in the government's ability to contain the new coronavirus                                                                                   |                                                                                                |
| 5.5  | I am confident in the public health measures established by the government                                                                                  |                                                                                                |
| 5.6  | The government has the proper infrastructure/services/systems in place to contain a potential outbreak                                                      |                                                                                                |
| 5.7  | I trust the information that the government has provided about how to protect myself from the new coronavirus                                               |                                                                                                |
| 5.8  | I am confident in the government's ability to care for the people who have been affected by the new coronavirus                                             |                                                                                                |
| 5.9  | The government has the proper infrastructure/services/systems in place to provide appropriate care for people who have been affected by the new coronavirus |                                                                                                |
| 5.10 | The government is committed to protecting me from the new coronavirus                                                                                       |                                                                                                |
| 5.11 | The government's actions in response to the new coronavirus are in my best interests                                                                        |                                                                                                |
| 5.12 | The government's actions in response to the new coronavirus are in the best interests of the Singapore population                                           |                                                                                                |

#### 6. Acceptance of control measures (5 questions)

|     |                                                                                                  |                                                                                                    |
|-----|--------------------------------------------------------------------------------------------------|----------------------------------------------------------------------------------------------------|
|     | Please indicate the degree to which you agree with the following statements:                     | 1= completely disagree; 2 = disagree; 3 = don't disagree or agree; 4 = agree; 5 = completely agree |
| 6.1 | Public Health authorities should have the power to order people into quarantine during outbreaks |                                                                                                    |

|     |                                                                                                                                                                                                                                                                                                                                                                                                                                                                                                                                                                                                                                                                                                                                                                           |                                                                               |
|-----|---------------------------------------------------------------------------------------------------------------------------------------------------------------------------------------------------------------------------------------------------------------------------------------------------------------------------------------------------------------------------------------------------------------------------------------------------------------------------------------------------------------------------------------------------------------------------------------------------------------------------------------------------------------------------------------------------------------------------------------------------------------------------|-------------------------------------------------------------------------------|
| 6.2 | If someone came into contact with a person who had symptoms of coronavirus infection, they should be quarantined                                                                                                                                                                                                                                                                                                                                                                                                                                                                                                                                                                                                                                                          |                                                                               |
| 6.3 | If someone is given a quarantine order by Public Health authorities, they should follow it no matter what else is going on in their life at work or home                                                                                                                                                                                                                                                                                                                                                                                                                                                                                                                                                                                                                  |                                                                               |
| 6.4 | If I go into quarantine, my family/friends/community will be protected from becoming sick                                                                                                                                                                                                                                                                                                                                                                                                                                                                                                                                                                                                                                                                                 |                                                                               |
| 6.5 | <p>Imagine that Singapore's health authorities advised these measures. For each measure, please indicate <u>how likely you are to adhere to each measure</u>:</p> <ol style="list-style-type: none"> <li>1. Keeping away from crowded places</li> <li>2. Washing hands more regularly with soap and water</li> <li>3. Cleaning or disinfecting things you might touch</li> <li>4. Avoiding public transport</li> <li>5. Avoiding travel to affected countries</li> <li>6. Avoiding people who have flu-like symptoms</li> <li>7. Wearing face masks out in public</li> <li>8. Wearing face masks at home</li> <li>9. Seeking medical advice with the onset of symptoms</li> <li>10. Taking preventive medication</li> <li>11. Staying home from school or work</li> </ol> | 1 = certainly not; 2 = probably not; 3 = neutral; 4 = probably; 5 = certainly |

## 7. Behavioural responses (21 questions)

|     |                                                                                                            |                                |
|-----|------------------------------------------------------------------------------------------------------------|--------------------------------|
|     | Over the past week, have you done any of the following to reduce the risk of infection from the new virus? | 1 = Yes;<br>0 = No;<br>2 = N/A |
| 7.1 | Deliberately cancelled or postponed a social event, such as meeting friends, eating out etc.               |                                |
| 7.2 | Deliberately cancelled or postponed work-related travel plans                                              |                                |
| 7.3 | Deliberately cancelled or postponed personal travel plans                                                  |                                |



|      |                                                                                                          |  |
|------|----------------------------------------------------------------------------------------------------------|--|
| 7.4  | Reduced the amount you use public transport (buses & MRT; should we include taxi/grabs?)                 |  |
| 7.5  | Reduced the amount of time you spend outside your home                                                   |  |
| 7.6  | Took time off work because I was feeling unwell                                                          |  |
| 7.7  | Took time off work because I did not want to get infected by someone else                                |  |
| 7.8  | Kept one or more of my children out of school to avoid contact with other children                       |  |
| 7.9  | Kept one or more of my children out of school because s/he exhibited flu-like symptoms                   |  |
| 7.10 | Kept away from crowded places (shopping malls, supermarkets etc.)                                        |  |
| 7.11 | Kept away from healthcare institutions (hospitals, polyclinics etc.)                                     |  |
| 7.12 | Kept away from people who exhibit flu-like symptoms                                                      |  |
| 7.13 | Used face masks more frequently                                                                          |  |
| 7.14 | Increased the amount I clean or disinfect things that I might touch (e.g. door knobs)                    |  |
| 7.15 | Washed my hands with soap and water more often than usual                                                |  |
| 7.16 | Stocked up on precautionary/treatment measures (e.g. medications, face masks, hand soap, hand sanitizer) |  |

|      |                                               |  |
|------|-----------------------------------------------|--|
| 7.17 | Stocked up on groceries                       |  |
| 7.18 | Got the influenza vaccine (flu shot, flu jab) |  |
| 7.19 | Drank more warm water                         |  |
| 7.20 | Took more vitamin C                           |  |
| 7.21 | Took antibiotics                              |  |

Thank you so much for your time.
